# Supplementary material for: Distinctive Effects of Surface Roughness and Ions Release on the Bacterial Adhesion and Inactivation of Textured Copper Oxide Surfaces
Source: MDPI journal article supplement (doi:10.3390/coatings13020454), 2023-02-16
Supplement: s1 [file s1]

Supplementary Materials

# Distinctive Effects of Surface Roughness and Ions Release on the Bacterial Adhesion and Inactivation of Textured Copper Oxide Surfaces

Akram Alhussein <sup>1,\*</sup>, Lylia Aouchiche <sup>2</sup>, Abdelhamid Hmima <sup>3</sup>, Delphine Retraint <sup>4</sup> and Sami Rtimi <sup>5,6,\*</sup>

<sup>1</sup> UR LASMIS, University of Technology of Troyes, Technological Pole of South Champagne, 26 Lavoisier rd, 52800 Nogent, France

<sup>2</sup> LEC2M, Mouloud Mammeri University of Tizi-Ouzou, 15000 Tizi-Ouzou, Algeria

<sup>3</sup> L2n, CNRS ERL 7004, University of Technology of Troyes, 12 Marie Curie rd, CS 42060, 10004 Troyes, France

<sup>4</sup> UR LASMIS, University of Technology of Troyes, 12 Marie Curie rd, CS 42060, 10004 Troyes, France

<sup>5</sup> Ecole Polytechnique Fédérale de Lausanne (EPFL), 1015 Lausanne, Switzerland

<sup>6</sup> Global Institute for Water, Environment and Health (GIWEH), 1210 Geneva, Switzerland

\* Correspondence: akram.alhussein@utt.fr (A.A.); rtimi.sami@gmail.com (S.R.)

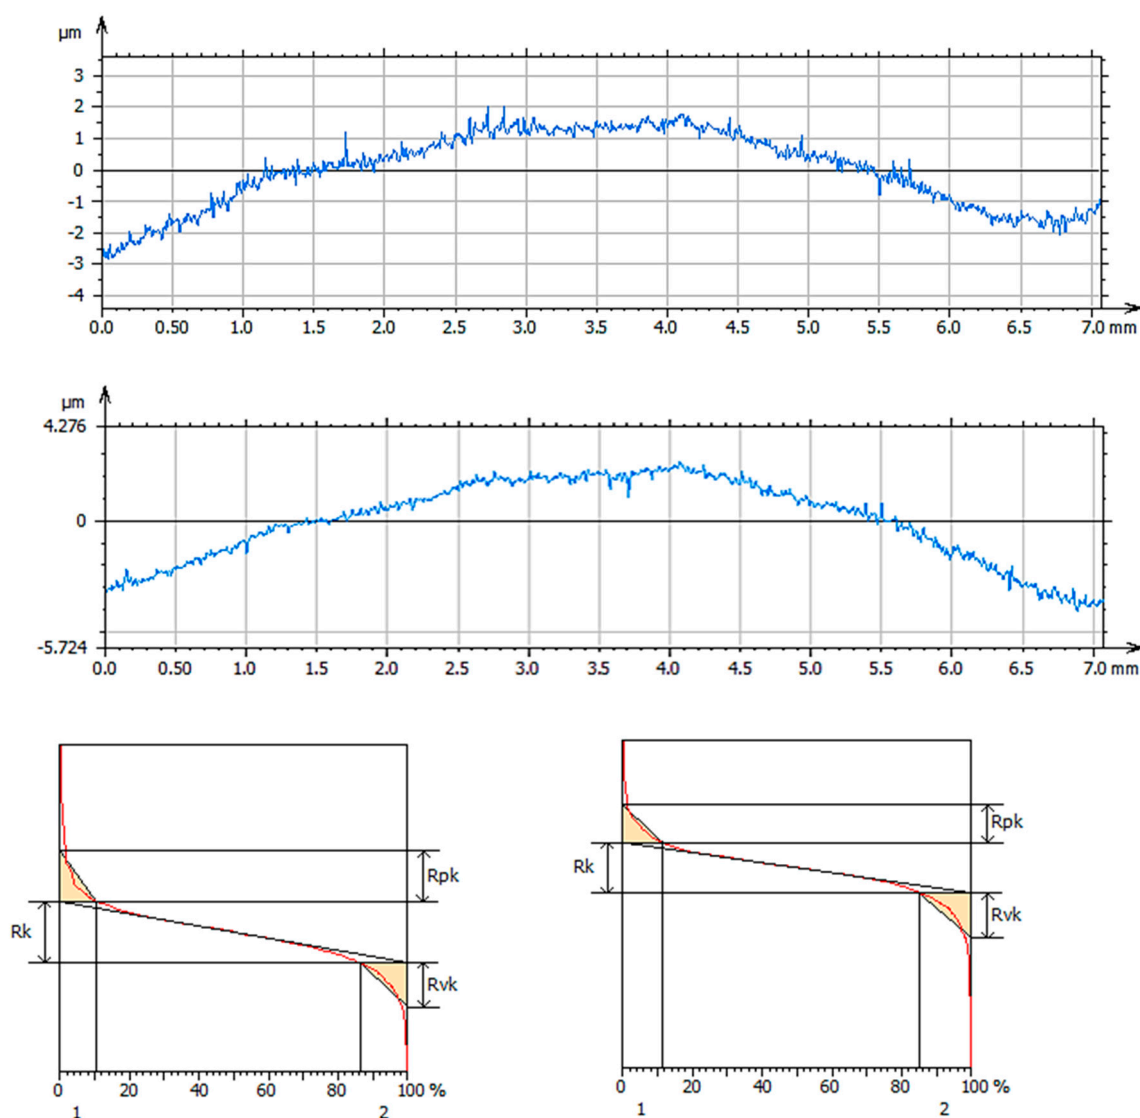

|     |        |                           |
|-----|--------|---------------------------|
| Rk  | 0.2209 | $\mu\text{m}$             |
| Rpk | 0.1845 | $\mu\text{m}$             |
| Rvk | 0.1609 | $\mu\text{m}$             |
| MR1 | 10.35  | %                         |
| MR2 | 86.30  | %                         |
| A1  | 9.548  | $\mu\text{m}^2/\text{mm}$ |
| A2  | 11.02  | $\mu\text{m}^2/\text{mm}$ |

|     |        |                           |
|-----|--------|---------------------------|
| Rk  | 0.1989 | $\mu\text{m}$             |
| Rpk | 0.1469 | $\mu\text{m}$             |
| Rvk | 0.1774 | $\mu\text{m}$             |
| MR1 | 11.44  | %                         |
| MR2 | 84.90  | %                         |
| A1  | 8.405  | $\mu\text{m}^2/\text{mm}$ |
| A2  | 13.40  | $\mu\text{m}^2/\text{mm}$ |

Figure S1. Analysis of surface roughness of polished reference sample.

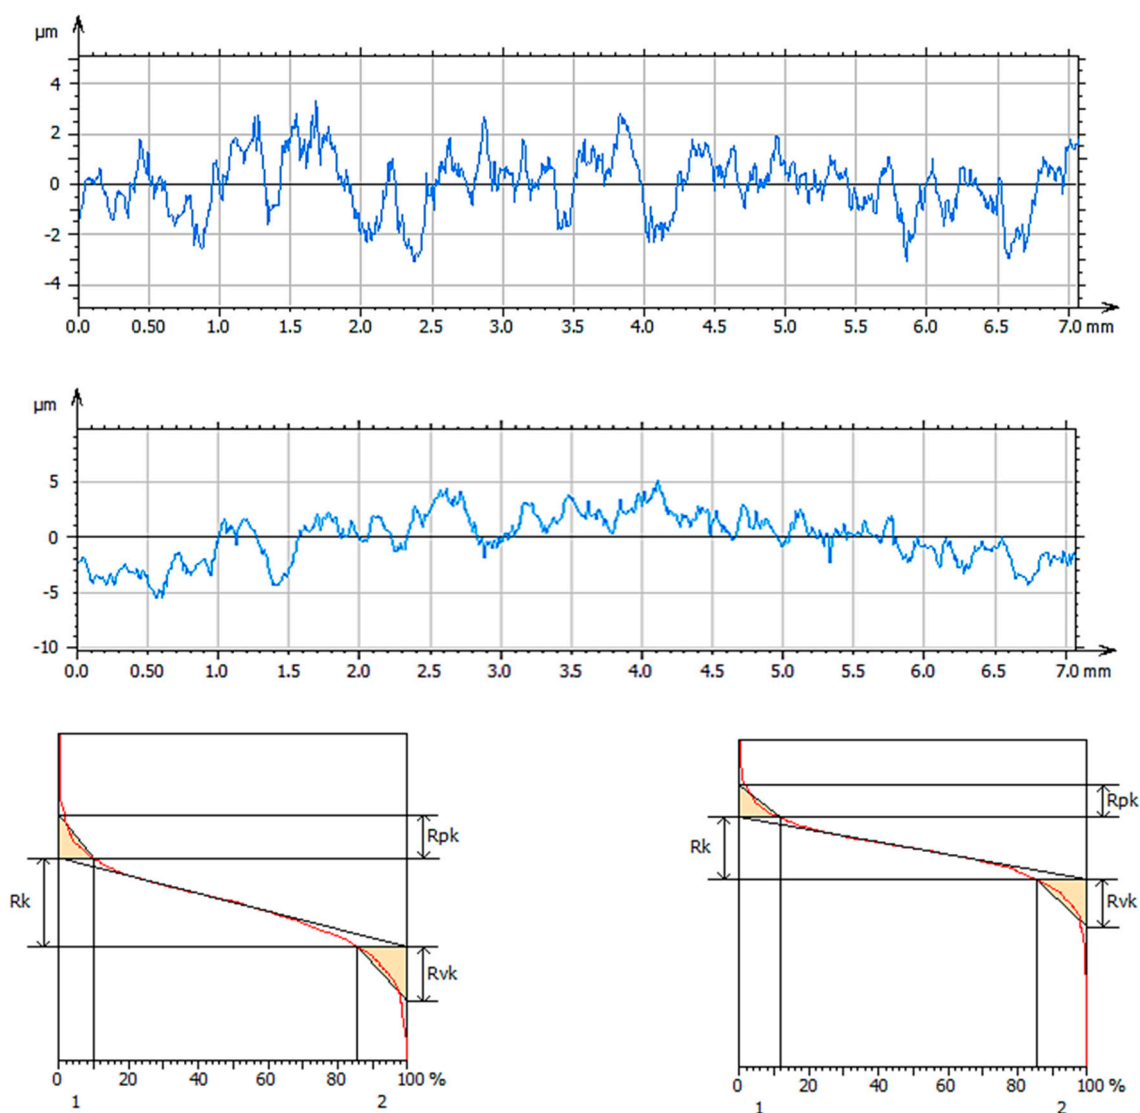

|     |        |                           |
|-----|--------|---------------------------|
| Rk  | 0.5504 | $\mu\text{m}$             |
| Rpk | 0.2649 | $\mu\text{m}$             |
| Rvk | 0.3379 | $\mu\text{m}$             |
| MR1 | 9.832  | %                         |
| MR2 | 85.69  | %                         |
| A1  | 13.02  | $\mu\text{m}^2/\text{mm}$ |
| A2  | 24.17  | $\mu\text{m}^2/\text{mm}$ |

|     |        |                           |
|-----|--------|---------------------------|
| Rk  | 0.5413 | $\mu\text{m}$             |
| Rpk | 0.2775 | $\mu\text{m}$             |
| Rvk | 0.4141 | $\mu\text{m}$             |
| MR1 | 11.78  | %                         |
| MR2 | 85.28  | %                         |
| A1  | 16.34  | $\mu\text{m}^2/\text{mm}$ |
| A2  | 30.48  | $\mu\text{m}^2/\text{mm}$ |

Figure S2. Analysis of surface roughness of Low SMATed reference sample.

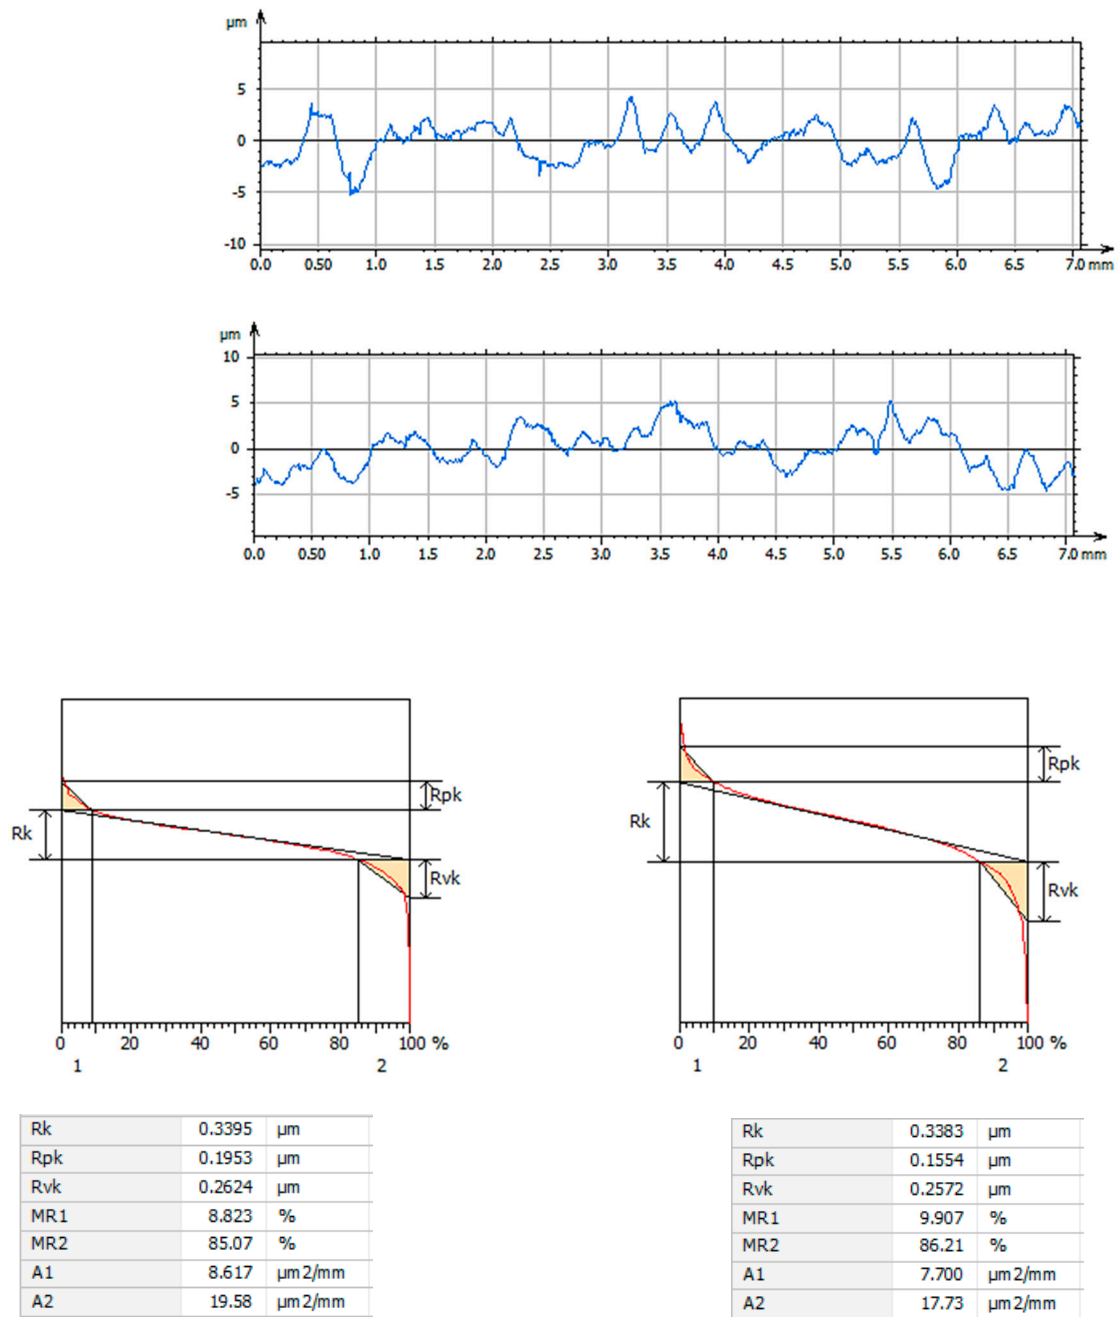

**Figure S3.** Analysis of surface roughness of High SMATed reference sample.

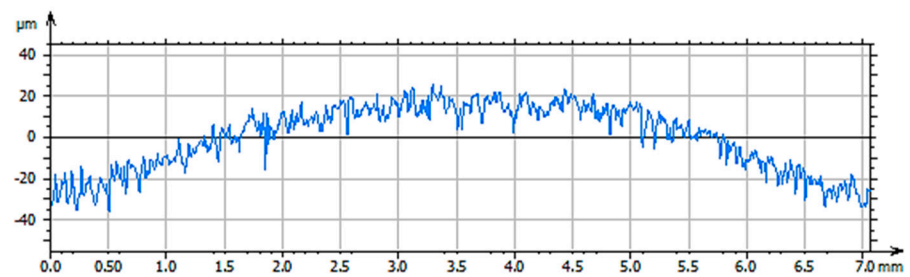

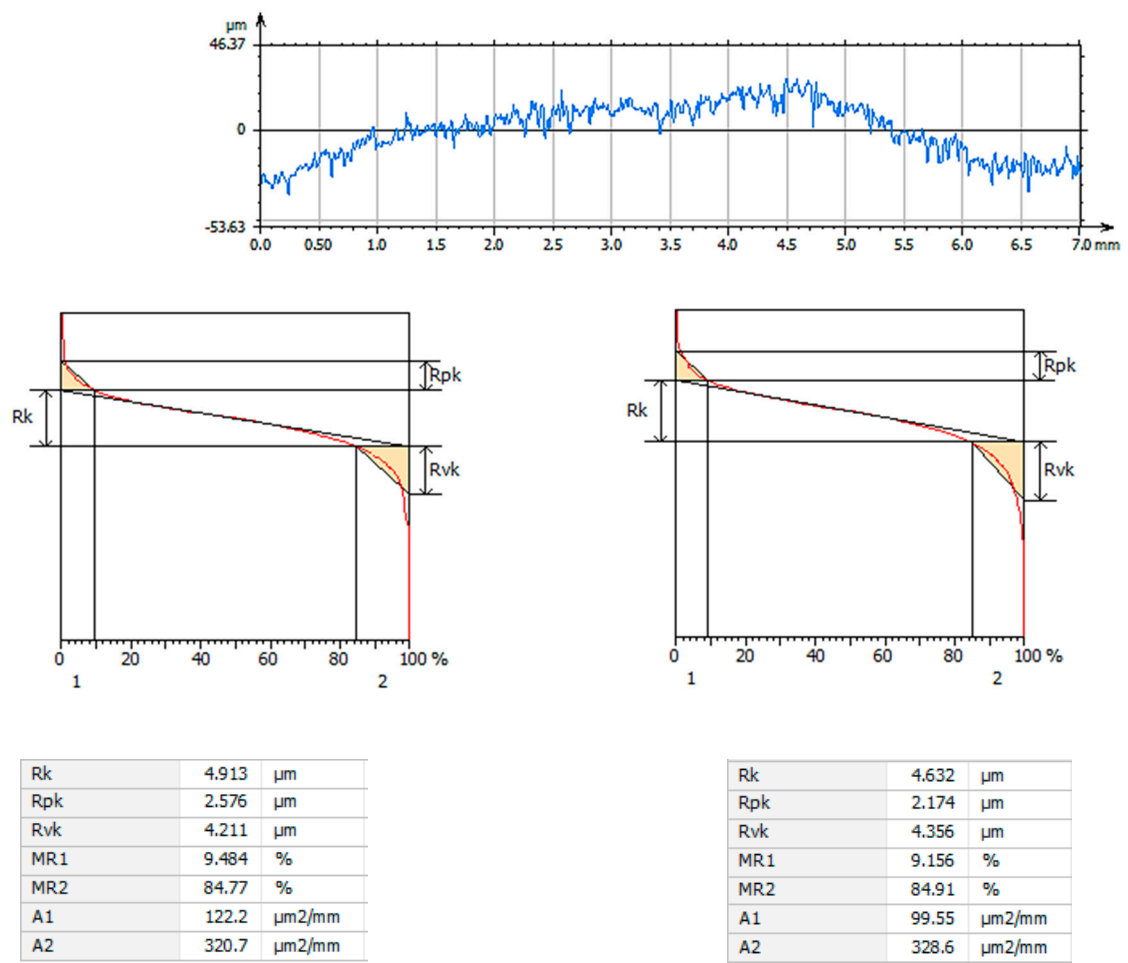

**Figure S4.** Analysis of surface roughness of sandblasted reference sample.
